## Correction

# Correction: Heterogeneity, Mixing, and the Spatial Scales of Mosquito-Borne Pathogen Transmission

The *PLOS Computational Biology* Staff

## Notice of Republication

This article was republished on February 10, 2014, to replace an incorrectly published version. Please download this article again to view the correct version. The originally published, uncorrected article and the republished, corrected article are provided here for reference.

## Supporting Information

**File S1.** Originally published, uncorrected article (PDF)

**File S2.** Republished corrected article (PDF)

## Reference

1. Perkins TA, Scott TW, Le Menach A, Smith DL (2013) Heterogeneity, Mixing, and the Spatial Scales of Mosquito-Borne Pathogen Transmission. *PLoS Comput Biol* 9(12): e1003327. doi:10.1371/journal.pcbi.1003327

---

**Citation:** The *PLOS Computational Biology* Staff (2014) Correction: Heterogeneity, Mixing, and the Spatial Scales of Mosquito-Borne Pathogen Transmission. *PLoS Comput Biol* 10(2): e1003540. doi:10.1371/journal.pcbi.1003540

**Published:** February 28, 2014

**Copyright:** © 2014 The *PLOS Computational Biology* Staff. This is an open-access article distributed under the terms of the Creative Commons Attribution License, which permits unrestricted use, distribution, and reproduction in any medium, provided the original author and source are credited.
